# Supplementary material for: Effect of IGFBP-4 during In Vitro Maturation on Developmental Competence of Bovine Cumulus Oocyte Complexes
Source: MDPI journal article supplement (doi:10.3390/ani14050673), 2024-02-21
Supplement: s1 [file s1]

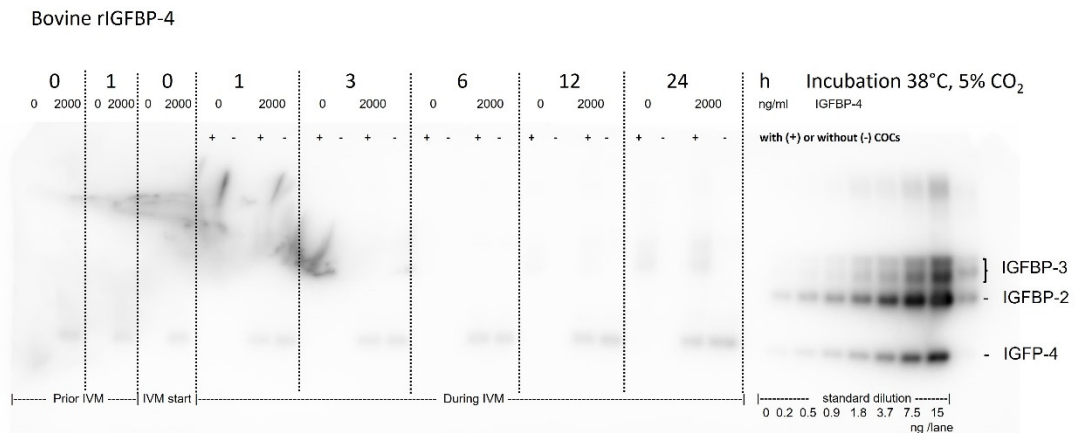

**Figure S1.** Supplementary figure. (A) Analysis of in vitro maturation (IVM) medium with and without addition of recombinant bovine insulin-like growth factor protein 4 (rbIGFBP-4). rbIGFBP-4 can be detected as a band in all samples in which rbIGFBP-4 (2,000 ng/ml) was added, prior to the start of IVM, samples were taken; (0) directly after IVM medium preparation, (1) one hour after incubation. Prior IVM start (0) a sample was taken before cumulus-oocyte complexes (COCs) were placed in the maturation plates. During IVM; samples were taken from wells in the presence (+) or absence (-) of COCs at one (1), three (3), six (6), twelve (12) and twenty-four (24) h after IVM started. The western ligand blot image was cropped at the level corresponding to IGFBP-4, an original image of the gel it is provided in the supplementary file (Figure 6). (B) analysis of intact of recombinant human IGFBP-4 (rhIGFBP-4), rbIGFBP-4, and recombinant human (IGFBP-2). (C) Protein quantity determination of rh- and rbIGFBP-4 and rhIGFBP-2.
